# Supplementary material for: The Heparan Sulfate Proteoglycan Syndecan-1 Triggers Breast Cancer Cell-Induced Coagulability by Induced Expression of Tissue Factor
Source: MDPI journal article supplement (doi:10.3390/cells12060910), 2023-03-16
Supplement: s1 [file s1]

**Supplementary Table 1. Different concentrations used for stimulation of MDA-MB-231 cells.**

| <b>Stimulant/inhibitor</b>      | <b>Applied concentration</b> | <b>Cat. no.</b> | <b>Supplier</b>                       |
|---------------------------------|------------------------------|-----------------|---------------------------------------|
| <b>IL6</b>                      | 100 ng/ml                    | 11340064        | ImmunoTools, Friesoythe, Germany      |
| <b>IL8</b>                      | 100 ng/ml                    | 11349084        | ImmunoTools, Friesoythe, Germany      |
| <b>VEGF</b>                     | 20 ng/ml                     | ACFP293         | R&D Systems, Minnesota, United States |
| <b>IGFR inhibitor (AG-1024)</b> | 20 $\mu$ M                   | S1234           | Selleck, Berlin, Germany              |
| <b>TFPI</b>                     | 50 ng/ml                     | SRP6458         | Merck KGaA, Darmstadt, Germany        |

**Supplementary Table 2. PCR primers used in this study.**

| <b>Gene</b>                     | <b>Forward primer sequences</b>      | <b>Reverse primer sequences</b>       |
|---------------------------------|--------------------------------------|---------------------------------------|
| <b><math>\beta</math>-Actin</b> | 5'-CAA AGA CCT GTA CGC CAA CAC-3'    | 5'-CAT ACT CCT GCT TGC TGA TCC-3'     |
| <b>Sdc-1</b>                    | 5'-AGG ACG AAG GCA GCT ACT CCT-3'    | 5'-TTT GGT GGG CTT CTG GTA GG-3'      |
| <b>F3</b>                       | 5'-CAG AGT TCA CAC CTT ACC TGG AG-3' | 5'-GTT GTT CCT TCT GAC TAA AGT CCG-3' |
| <b>F7</b>                       | 5'-CCT CAA GTC CAT GCC AGA ATG G-3'  | 5'-CAC AGA TCA GCT GGT CAT CCT TG-3'  |
| <b>F2R</b>                      | 5'-GTT TCT GGC TGT GGT GTA TCC C-3'  | 5'-CCT GGA TGG TTT GCT CCT TGA G-3'   |
| <b>F2RL1</b>                    | 5'-CTC CTC TCT GTC ATC TGG TTC C-3'  | 5'-TGC ACA CTG AGG CAG GTC ATG A-3'   |
| <b>EGFR</b>                     | 5'-CAATTGGAAGATTGGAAGATTCAGC-3'      | 5'-CCAGTCAGGTTACAGGGCACA-3'           |
| <b>MAPK1</b>                    | 5'-ACACCAACCTCTCGTACATCGG-3'         | 5'-TGGCAGTAGGTCTGGTGCTCAA-3'          |
| <b>NFkB</b>                     | 5'-GCAGCACTACTTCTTGACCACC-3'         | 5'-TCTGCTCCTGAGCATTGACGTC-3'          |
| <b>EDN1</b>                     | 5'-CTACTTCTGCCACCTGGACATC-3'         | 5'-TCACGGTCTGTTGCCTTTGTGG-3'          |
| <b>VEGFa</b>                    | 5'-TTGCCTTGCTGCTCTACCTCCA-3'         | 5'-GATGGCAGTAGCTGCGCTGATA-3'          |
| <b>IGFBP1</b>                   | 5'-TCCTTTGGGACGCCATCAGTAC-3'         | 5'-GATGTCTCCTGTGCCTTGGCTA-3'          |
| <b>IL6</b>                      | 5'-AGTGAGGAACAAGCCAGAGC-3'           | 5'-CATTTGTGGTTGGGTCAGG-3'             |

|                 |                               |                              |
|-----------------|-------------------------------|------------------------------|
| <b>IL8</b>      | 5'-GAGAGTGATTGAGAGTGGACCAC-3' | 5'-CACAACCCTCTGCACCCAGTTT-3' |
| <b>Survivin</b> | 5'-CCACTGAGAACGAGCCAGACTT-3'  | 5'-GTATTACAGGCGTAAGCCACCG-3' |

**Supplementary Table 3. Antibodies used in this study.**

| <b>Antibody</b>                        | <b>Cat. no.</b> | <b>Supplier</b>                                         |
|----------------------------------------|-----------------|---------------------------------------------------------|
| p-PTEN (Ser380)                        | 9551            | Cell Signaling Technology, Massachusetts, United States |
| p-p44/42 MAPK (Erk1/2) (Thr202/Tyr204) | 9101            | Cell Signaling Technology, Massachusetts, United States |
| p-STAT3 (Tyr705)                       | 9131s           | Cell Signaling Technology, Massachusetts, United States |
| IGF-I Receptor $\beta$                 | 3027            | Cell Signaling Technology, Massachusetts, United States |
| p-NFkB p65 (Ser536)                    | 3033s           | Cell Signaling Technology, Massachusetts, United States |
| GAPDH                                  | sc-47724        | Santa Cruz Biotechnology, Texas, United States          |
| Goat Anti-Rabbit IgG                   | 401353          | Merck KGaA, Darmstadt, Germany                          |
| Goat Anti-Mouse IgG                    | 401253          | Merck KGaA, Darmstadt, Germany                          |

**Supplementary Table 4. GO enrichment analysis associated with TF targets (F3, F7, F2R, F2RL1, and TFPI), Sdc-1 with respect to IL6, IL8, VEGF and IGF-IR. The program STRING was used for this analysis.**

| <b>Category</b>           | <b>Pathway description</b>                                     | <b>Observed gene count</b> | <b>False discovery rate</b> | <b>Matching proteins in your network (labels)</b>             |
|---------------------------|----------------------------------------------------------------|----------------------------|-----------------------------|---------------------------------------------------------------|
| <b>Molecular function</b> | Vascular endothelial growth factor-activated receptor activity | 4                          | 8,40E-07                    | FLT4,KDR,NRP1,FLT1                                            |
|                           | Vascular endothelial growth factor binding                     | 4                          | 8,40E-07                    | FLT4,KDR,NRP1,FLT1                                            |
|                           | Transmembrane receptor protein tyrosine kinase activity        | 5                          | 5,90E-06                    | FLT4,KDR,NRP1,IGF1R,FLT1                                      |
|                           | Signaling receptor binding                                     | 12                         | 5,90E-06                    | SDCBP,KDR,IGF1R,F2RL1,IGF1,IRS1,CXCL8,F2R,PTPN11,F7,IL6,VEGFA |

|                    |                                                          |    |          |                                                                                                  |
|--------------------|----------------------------------------------------------|----|----------|--------------------------------------------------------------------------------------------------|
|                    | Insulin receptor binding                                 | 4  | 1,03E-05 | IGF1R,IGF1,IRS1,PTPN11                                                                           |
|                    | Protein binding                                          | 19 | 2,19E-05 | SDCBP,FLT4,KDR,NRP1,IGF1R,FLT1,CXCR1,F2RL1,IGF1,IRS1,CXCL8,CXCR2,F2R,F3,PTPN11,F7,SDC1,IL6,VEGFA |
|                    | Transmembrane signaling receptor activity                | 10 | 4,48E-05 | FLT4,KDR,NRP1,IGF1R,FLT1,CXCR1,F2RL1,CXCR2,F2R,F3                                                |
|                    | Growth factor binding                                    | 5  | 9,20E-05 | FLT4,KDR,NRP1,IGF1R,FLT1                                                                         |
|                    | Interleukin-8 receptor activity                          | 2  | 0,0015   | CXCR1,CXCR2                                                                                      |
|                    | Interleukin-8 binding                                    | 2  | 0,0023   | CXCR1,CXCR2                                                                                      |
| Cellular component | Intrinsic component of plasma membrane                   | 13 | 1,26E-06 | SDCBP,FLT4,KDR,NRP1,IGF1R,FLT1,F2RL1,IRS1,CXCR2,F2R,F3,SDC1,IL6                                  |
|                    | Receptor complex                                         | 8  | 1,96E-06 | SDCBP,FLT4,KDR,NRP1,IGF1R,FLT1,IRS1,IL6                                                          |
|                    | Integral component of plasma membrane                    | 12 | 4,17E-06 | SDCBP,FLT4,KDR,NRP1,IGF1R,FLT1,F2RL1,IRS1,CXCR2,F2R,SDC1,IL6                                     |
|                    | Plasma membrane                                          | 17 | 4,83E-05 | TFPI,SDCBP,FLT4,KDR,NRP1,IGF1R,FLT1,CXCR1,F2RL1,IGF1,IRS1,CXCR2,F2R,F3,F7,SDC1,IL6               |
|                    | Cell surface                                             | 8  | 0,00023  | TFPI,NRP1,CXCR1,CXCR2,F2R,F3,SDC1,VEGFA                                                          |
|                    | Extracellular region                                     | 14 | 0,001    | TFPI,SDCBP,FLT4,KDR,NRP1,FLT1,IGF1,CXCL8,F2R,F3,F7,SDC1,IL6,VEGFA                                |
|                    | Serine-type peptidase complex                            | 2  | 0,0021   | F3,F7                                                                                            |
|                    | Insulin receptor complex                                 | 2  | 0,0023   | IGF1R,IRS1                                                                                       |
|                    | Endomembrane system                                      | 14 | 0,0023   | TFPI,SDCBP,KDR,NRP1,FLT1,CXCR1,F2RL1,IGF1,CXCR2,F2R,F7,SDC1,IL6,VEGFA                            |
|                    | Intrinsic component of membrane                          | 15 | 0,0023   | TFPI,SDCBP,FLT4,KDR,NRP1,IGF1R,FLT1,CXCR1,F2RL1,IRS1,CXCR2,F2R,F3,SDC1,IL6                       |
| Biological process | Positive regulation of cell migration                    | 15 | 5,39E-16 | SDCBP,FLT4,KDR,NRP1,IGF1R,FLT1,F2RL1,IGF1,CXCL8,CXCR2,F2R,F3,F7,IL6,VEGFA                        |
|                    | Positive regulation of intracellular signal transduction | 15 | 1,47E-12 | SDCBP,FLT4,KDR,NRP1,IGF1R,FLT1,F2RL1,IGF1,IRS1,F2R,F3,PTPN11,F7,IL6,VEGFA                        |
|                    | Positive regulation of chemotaxis                        | 9  | 2,05E-11 | KDR,NRP1,F2RL1,CXCL8,CXCR2,F3,F7,IL6,VEGFA                                                       |
|                    | Positive regulation of mapk                              | 12 | 2,85E-11 | SDCBP,FLT4,KDR,NRP1,IGF1R,FLT1,F2RL1,IGF1,F2R,PTPN11,IL6,VEGFA                                   |

|  |                                                         |    |          |                                                                                            |
|--|---------------------------------------------------------|----|----------|--------------------------------------------------------------------------------------------|
|  | cascade                                                 |    |          |                                                                                            |
|  | Regulation of localization                              | 18 | 6,91E-11 | SDCBP,FLT4,KDR,NRP1,IGF1R,FLT1,F2RL1,IGF1,IRS1,CXCL8,CXCR2,F2R,F3,PTPN11,F7,SDC1,IL6,VEGFA |
|  | Positive regulation of multicellular organismal process | 16 | 7,21E-11 | SDCBP,FLT4,KDR,NRP1,IGF1R,FLT1,F2RL1,IGF1,CXCL8,CXCR2,F2R,F3,PTPN11,F7,IL6,VEGFA           |
|  | Positive regulation of response to stimulus             | 17 | 8,89E-11 | SDCBP,FLT4,KDR,NRP1,IGF1R,FLT1,F2RL1,IGF1,IRS1,CXCL8,CXCR2,F2R,F3,PTPN11,F7,IL6,VEGFA      |
|  | Positive regulation of cell population proliferation    | 13 | 2,88E-10 | SDCBP,FLT4,KDR,NRP1,IGF1R,FLT1,IGF1,IRS1,CXCR2,F2R,F3,IL6,VEGFA                            |
|  | Response to organic substance                           | 18 | 2,88E-10 | TFPI,FLT4,KDR,NRP1,IGF1R,FLT1,CXCR1,IGF1,IRS1,CXCL8,CXCR2,F2R,F3,PTPN11,F7,SDC1,IL6,VEGFA  |
|  | Positive regulation of positive chemotaxis              | 6  | 3,33E-10 | KDR,F2RL1,CXCL8,F3,F7,VEGFA                                                                |

**Supplementary Table 5. KEGG pathways associated with TF targets (F3, F7, F2R, F2RL1, and TFPI), Sdc-1 with respect to IL6, IL8, VEGF and IGF-IR according to KEEG enrichment analysis.** The program STRING was used for this analysis.

| Pathway description                       | Observed gene count | False discovery rate | Matching proteins in your network (labels)  |
|-------------------------------------------|---------------------|----------------------|---------------------------------------------|
| PI3K-Akt signaling pathway                | 9                   | 9,98E-09             | FLT4,KDR,IGF1R,FLT1,IGF1,IRS1,F2R,IL6,VEGFA |
| Rap1 signaling pathway                    | 7                   | 1,65E-07             | FLT4,KDR,IGF1R,FLT1,IGF1,F2R,VEGFA          |
| Ras signaling pathway                     | 7                   | 2,35E-07             | FLT4,KDR,IGF1R,FLT1,IGF1,PTPN11,VEGFA       |
| EGFR tyrosine kinase inhibitor resistance | 5                   | 1,50E-06             | KDR,IGF1R,IGF1,IL6,VEGFA                    |
| Focal adhesion                            | 6                   | 2,58E-06             | FLT4,KDR,IGF1R,FLT1,IGF1,VEGFA              |
| Proteoglycans in cancer                   | 6                   | 2,58E-06             | KDR,IGF1R,IGF1,PTPN11,SDC1,VEGFA            |
| HIF-1 signaling pathway                   | 5                   | 3,71E-06             | IGF1R,FLT1,IGF1,IL6,VEGFA                   |
| MAPK signaling pathway                    | 6                   | 1,48E-05             | FLT4,KDR,IGF1R,FLT1,IGF1,VEGFA              |
| Phospholipase D signaling pathway         | 5                   | 1,48E-05             | CXCR1,CXCL8,CXCR2,F2R,PTPN11                |

|                                                            |   |          |                                     |
|------------------------------------------------------------|---|----------|-------------------------------------|
| Pathways in cancer                                         | 7 | 1,81E-05 | FLT4,IGF1R,IGF1,CXCL8,F2R,IL6,VEGFA |
| Epithelial cell signaling in Helicobacter pylori infection | 4 | 2,25E-05 | CXCR1,CXCL8,CXCR2,PTPN11            |
| Transcriptional misregulation in cancer                    | 5 | 2,25E-05 | IGF1R,FLT1,IGF1,CXCL8,IL6           |
| Complement and coagulation cascades                        | 4 | 4,11E-05 | TFPI,F2R,F3,F7                      |
| Rheumatoid arthritis                                       | 4 | 4,38E-05 | FLT1,CXCL8,IL6,VEGFA                |

**Supplementary Table 6. Statistical co-citation analysis associated with TF targets (F3, F7, F2R, F2RL1, and TFPI), Sdc-1 with respect to IL6, IL8, VEGF and IGF-IR according to PubMed.** The program STRING was used for this analysis.

| Pathway description                                                                                                                                                             | Observed gene count | False discovery rate | Matching proteins in your network (labels)          |
|---------------------------------------------------------------------------------------------------------------------------------------------------------------------------------|---------------------|----------------------|-----------------------------------------------------|
| (2011) Pharmacogenetic angiogenesis profiling for first-line Bevacizumab plus oxaliplatin-based chemotherapy in patients with metastatic colorectal cancer.                     | 9                   | 2.27e-15             | KDR,NRP1,CXCR1,IGF1,CXCL8,CXCR2,F3,IL6,VEGFA        |
| (2011) Targeting angiogenesis in childhood sarcomas.                                                                                                                            | 9                   | 8.41e-14             | FLT4,KDR,IGF1R,FLT1,IGF1,IRS1,CXCL8,IL6,VEGFA       |
| (2011) HCC and angiogenesis: possible targets and future directions.                                                                                                            | 9                   | 9.02e-14             | FLT4,KDR,FLT1,CXCR1,IGF1,CXCL8,CXCR2,IL6,VEGFA      |
| (2016) The molecular mechanisms of hemodialysis vascular access failure.                                                                                                        | 9                   | 4.39e-13             | KDR,FLT1,IGF1,CXCL8,CXCR2,F3,SDC1,IL6,VEGFA         |
| (2019) The role of vascular endothelial growth factor, interleukin 8, and insulin like growth factor in sustaining autophagic DIRAS3-induced dormant ovarian cancer xenografts. | 8                   | 4.90e-13             | KDR,IGF1R,FLT1,CXCR1,IGF1,CXCL8,IL6,VEGFA           |
| (2018) Receptor tyrosine kinases (RTKs) in breast cancer: signaling, therapeutic implications and challenges.                                                                   | 10                  | 8.42e-13             | FLT4,KDR,IGF1R,FLT1,IGF1,IRS1,CXCL8,SDC1,IL6,VEGFA  |
| (2015) Modulation of cellular signaling by herpesvirus-encoded G protein-coupled receptors.                                                                                     | 10                  | 8.42e-13             | KDR,IGF1R,FLT1,CXCR1,IGF1,CXCL8,CXCR2,F2R,IL6,VEGFA |
| (2013) Current status of bevacizumab in advanced ovarian cancer.                                                                                                                | 8                   | 8.42e-13             | FLT4,KDR,NRP1,FLT1,IGF1,CXCL8,IL6,VEGFA             |
| (2016) Glioblastoma Stem Cells Microenvironment: The                                                                                                                            | 10                  | 9.28e-13             | FLT4,KDR,IGF1R,FLT1,CXCR1,IGF1,CXCL8,CXCR2,IL6,V    |

|                                                                                                                                                                                 |    |          |                                                    |
|---------------------------------------------------------------------------------------------------------------------------------------------------------------------------------|----|----------|----------------------------------------------------|
| Paracrine Roles of the Niche in Drug and Radioresistance.                                                                                                                       |    |          | EGFA                                               |
| (2012) Integrin-mediated cell-matrix interaction in physiological and pathological blood vessel formation.                                                                      | 10 | 1.23e-12 | TFPI,KDR,NRP1,FLT1,IRS1,CXCL8,F3,PTPN11,SDC1,VEGFA |
| (2011) Pharmacogenetic angiogenesis profiling for first-line Bevacizumab plus oxaliplatin-based chemotherapy in patients with metastatic colorectal cancer.                     | 9  | 2.27e-15 | KDR,NRP1,CXCR1,IGF1,CXCL8,CXCR2,F3,IL6,VEGFA       |
| (2011) Targeting angiogenesis in childhood sarcomas.                                                                                                                            | 9  | 8.41e-14 | FLT4,KDR,IGF1R,FLT1,IGF1,IRS1,CXCL8,IL6,VEGFA      |
| (2011) HCC and angiogenesis: possible targets and future directions.                                                                                                            | 9  | 9.02e-14 | FLT4,KDR,FLT1,CXCR1,IGF1,CXCL8,CXCR2,IL6,VEGFA     |
| (2016) The molecular mechanisms of hemodialysis vascular access failure.                                                                                                        | 9  | 4.39e-13 | KDR,FLT1,IGF1,CXCL8,CXCR2,F3,SDC1,IL6,VEGFA        |
| (2019) The role of vascular endothelial growth factor, interleukin 8, and insulin like growth factor in sustaining autophagic DIRAS3-induced dormant ovarian cancer xenografts. | 8  | 4.90e-13 | KDR,IGF1R,FLT1,CXCR1,IGF1,CXCL8,IL6,VEGFA          |
